# Supplementary material for: Autism and the right to education in the EU: Policy mapping and scoping review of the United Kingdom, France, Poland and Spain
Source: PubMed Central journal article supplement (PMC6116926; doi:10.1371/journal.pone.0202336), 2018-08-30
Supplement: pone.0202336.s001.pdf [file pone.0202336.s001.pdf]

- 1 10 year Scottish Strategy for Autism (2011). Available at:  
<http://www.gov.scot/Resource/Doc/361926/0122373.pdf>.
- 2 Act on Education System (1991). Available at:  
<http://dziennikustaw.gov.pl/du/1991/s/95/425>.
- 3 ASD Strategic Action Plan (2009). Available at:  
[http://www.hscboard.hscni.net/download/PUBLICATIONS/AUTISTIC\\_SPECTRUM\\_DISORDER/DHSSPS ASD Strategic Action Plan June 2009 - PDF 373KB.pdf](http://www.hscboard.hscni.net/download/PUBLICATIONS/AUTISTIC_SPECTRUM_DISORDER/DHSSPS_ASD_Strategic_Action_Plan_June_2009_-_PDF_373KB.pdf).
- 4 Autism Act (2009). Available at: <http://www.legislation.gov.uk/ukpga/2009/15>.
- 5 'Autism Act (Northern Ireland)' (2011). Available at:  
[http://www.legislation.gov.uk/ni/2011/27/pdfs/ni\\_20110027\\_en.pdf](http://www.legislation.gov.uk/ni/2011/27/pdfs/ni_20110027_en.pdf).
- 6 Charter for Persons with Autism (1992). Available at:  
<http://www.autismeurope.org/files/files/charter-for-persons-with-autism.pdf>.
- 7 Charter for Persons with Autism Poland (2013). Available at:  
[http://orka.sejm.gov.pl/opinie7.nsf/nazwa/380\\_u/\\$file/380\\_u.pdf](http://orka.sejm.gov.pl/opinie7.nsf/nazwa/380_u/$file/380_u.pdf).
- 8 Children and Families Act (2014). Available at:  
<http://www.legislation.gov.uk/ukpga/2014/6/contents/enacted>.
- 9 Constitution of The Republic of Poland (1997). Available at:  
<http://www.sejm.gov.pl/prawo/konst/angielski/kon1.htm>.
- 10 CRPD (2008). Available at:  
<http://www.ohchr.org/EN/HRBodies/CRPD/Pages/ConventionRightsPersonsWithDisabilities.aspx>.
- 11 Declaration of the Rights of the Child (1959). doi: 10.1017/S0020860400013243.
- 12 Declaration on the Rights of Disabled Persons (1975). Available at:  
<http://www.ohchr.org/Documents/ProfessionalInterest/res3447.pdf>.
- 13 Declaration on the Rights of Mentally Retarded Persons (1971). Available at:  
<http://www.ncbi.nlm.nih.gov/pubmed/10239923>.
- 14 Education (Additional Support for Learning) (Scotland) Act 2004 (2004). Available at:  
[http://www.legislation.gov.uk/asp/2004/4/pdfs/asp\\_20040004\\_en.pdf](http://www.legislation.gov.uk/asp/2004/4/pdfs/asp_20040004_en.pdf).
- 15 Equality Act (2010). doi: ISBN 978-0-10-541510-7.
- 16 European Disability Strategy 2010-2020 (2010). doi: 10.1017/CBO9781107415324.004.
- 17 Fulfilling and Rewarding Lives (2010). Available at:  
[http://webarchive.nationalarchives.gov.uk/20130107105354/http://www.dh.gov.uk/prod\\_consum\\_dh/groups/dh\\_digitalassets/@dh/@en/@ps/documents/digitalasset/dh\\_113405.pdf](http://webarchive.nationalarchives.gov.uk/20130107105354/http://www.dh.gov.uk/prod_consum_dh/groups/dh_digitalassets/@dh/@en/@ps/documents/digitalasset/dh_113405.pdf).
- 18 Human Rights Act (1998). Available at: <http://www.legislation.gov.uk/ukpga/1998/42>.
- 19 Law no. 2005-102 (2005).

- 20 Law no. 75-535 (1975).
- 21 Law no. 96-1076 (1996).
- 22 Preamble to the Constitution of 27 October (1946). Available at: [http://www.conseil-constitutionnel.fr/conseil-constitutionnel/root/bank\\_mm/anglais/cst3.pdf](http://www.conseil-constitutionnel.fr/conseil-constitutionnel/root/bank_mm/anglais/cst3.pdf).
- 23 Refreshed Autistic Spectrum Disorder (ASD) Strategic Action Plan created for 2016-2020 (2016). Available at: <http://gov.wales/docs/dhss/publications/161205asd-delivery-en.pdf>.
- 24 Spanish Constitution (1978). Available at: [http://www.congreso.es/portal/page/portal/Congreso/Congreso/Hist\\_Normas/Norm/const\\_espa\\_texo\\_ingles\\_0.pdf](http://www.congreso.es/portal/page/portal/Congreso/Congreso/Hist_Normas/Norm/const_espa_texo_ingles_0.pdf).
- 25 Spanish Strategy For ASD (2015). Available at: <https://www.msssi.gob.es/ssi/discapacidad/informacion/estrategiaEspanolaAutismo.htm>.
- 26 Special Educational Needs and Disability (Northern Ireland) Order (2005).
- 27 Special Educational Needs and Disability Act (2001). Available at: <http://www.legislation.gov.uk/ukpga/2001/10/contents>.
- 28 Standards in Scotland's Schools Act (2000). Available at: <http://www.legislation.gov.uk/asp/2000/6>.
- 29 Statutory Framework for the Early Years Foundation Stage (2014). doi: 00266-2008BKT-EN.
- 30 Statutory Guidance - Special Educational Needs and Disability Code of Practice: 0 to 25 years (2015). doi: DFE-00205-2013.
- 31 Statutory Guidance Fulfilling and Rewarding Lives (2010). Available at: <https://www.gov.uk/government/publications/implementing-fulfilling-and-rewarding-lives>.
- 32 The Autism Strategy (2013 – 2020) Action Plan (2013 – 2016) (2013). Available at: <https://www.health-ni.gov.uk/sites/default/files/publications/dhssps/autism-strategy-progress-report-2015.pdf>.
- 33 The Autistic Spectrum Disorder (ASD) Strategic Action Plan for Wales (2009). Available at: <http://www.wales.nhs.uk/documents/ASD-strategy.pdf>.
- 34 The Charter of Fundamental Rights of the European Union (2000). doi: 10.1108/03090550310770974.
- 35 The First Autism Plan (2005). Available at: <http://www.psydoc-france.fr/Professi/Autisme/Plans/PlanAutisme2005-2006.pdf>.
- 36 The Second Autism Plan (2008). Available at: [http://www.cnsa.fr/documentation/plan\\_autisme\\_2008.pdf](http://www.cnsa.fr/documentation/plan_autisme_2008.pdf).
- 37 The Third Autism Plan (2013). Available at: <http://www.cnsa.fr/documentation/plan-autisme2013.pdf>.

- 38 The Treaty on the Functioning of the European Union (2007). Available at: <http://eur-lex.europa.eu/legal-content/EN/TXT/?uri=celex%3A12012E%2FTXT>.
- 39 Think Autism (2014). Available at: <http://www.autism.org.uk/~media/NAS/Documents/News-and-events/News-from-the-NAS/Think-Autism-Strategy.ashx>.
- 40 Together for Mental Health. A Strategy for Mental Health and Wellbeing in Wales (2012). Available at: <http://gov.wales/topics/health/nhswales/plans/mental-health/?lang=en>.
- 41 Treaty on the European Union (2012). Available at: <http://eur-lex.europa.eu/legal-content/EN/TXT/?uri=celex%3A12012M%2FTXT>.
- 42 UDHR (1948). Available at: [http://www.ohchr.org/EN/UDHR/Documents/UDHR\\_Translations/eng.pdf](http://www.ohchr.org/EN/UDHR/Documents/UDHR_Translations/eng.pdf).
- 43 WHO (2011) World Report on Disability. Available at: [http://www.who.int/disabilities/world\\_report/2011/report.pdf](http://www.who.int/disabilities/world_report/2011/report.pdf).
- 44 WHO (2016) Demographic and Socioeconomic Statistics. Available at: <http://apps.who.int/gho/data/view.main.POP2040?lang=en>.
- 45 Written Declaration on Autism (2015). Available at: <http://www.europarl.europa.eu/sides/getDoc.do?pubRef=-//EP//NONSGML+WDECL+P8-DCL-2015-0030+0+DOC+PDF+V0//EN&language=EN>.
